# Supplementary material
Source: publisher figshare collection journal article supplement (https://diabetesjournals.figshare.com/ndownloader/files/27536567)
Supplement: Supplementary file 1 [file 27536567]

**SUPPLEMENTAL FIGURE S3.** Control chart of CGM use at three adult sites.

|  | May 18 | Jun  18 | Jul  18 | Aug  18 | Sep  18 | Oct  18 | Nov  18 | Dec  18 | Jan  19 | Feb  19 | Mar  19 | Apr  19 | May 19 | Jun  19 | Jul  19 | Aug  19 | Sep  19 | Oct  19 | Nov  19 | Dec  19 | Jan  20 | Feb  20 | Mar  20 |
| --- | --- | --- | --- | --- | --- | --- | --- | --- | --- | --- | --- | --- | --- | --- | --- | --- | --- | --- | --- | --- | --- | --- | --- |
| Dem | 86 | 81 | 60 | 71 | 55 | 77 | 57 | 82 | 95 | 58 | 81 | 79 | 92 | 78 | 94 | 84 | 75 | 81 | 81 | 95 | 109 | 60 | 35 |
| Num | 23 | 19 | 24 | 14 | 8 | 24 | 12 | 16 | 34 | 20 | 14 | 21 | 31 | 18 | 28 | 28 | 19 | 27 | 28 | 34 | 42 | 15 | 10 |

|  | Nov  18 | Dec  18 | Jan  19 | Feb  19 | Mar19 | Apr  19 | May 19 | Jun  19 | Jul  19 | Aug  19 | Sep  19 | Oct  19 | Nov  19 | Dec  19 |
| --- | --- | --- | --- | --- | --- | --- | --- | --- | --- | --- | --- | --- | --- | --- |
| Dem | 39 | 60 | 42 | 26 | 55 | 53 | 40 | 35 | 44 | 42 | 33 | 40 | 34 | 38 |
| Num | 23 | 30 | 24 | 11 | 33 | 34 | 30 | 26 | 26 | 31 | 22 | 30 | 23 | 27 |

|  | May-18 | Jun-18 | Jul-18 | Aug-18 | Sep-18 | Oct-18 | Nov-18 | Dec-18 | Jan-19 | Feb-19 | Mar-19 | Apr-19 | May-19 | Jun-19 | Jul-19 | Aug-19 | Sep-19 | Oct-19 | Nov-19 | Dec-19 |
| --- | --- | --- | --- | --- | --- | --- | --- | --- | --- | --- | --- | --- | --- | --- | --- | --- | --- | --- | --- | --- |
| Dem | 93 | 61 | 67 | 103 | *57* | 79 | 78 | 82 | 96 | 76 | 74 | 80 | 96 | 80 | 67 | 90 | 76 | 57 | 37 | 48 |
| Num | 46 | 27 | 31 | 51 | 28 | 37 | 44 | 50 | 58 | 38 | 48 | 42 | 47 | 50 | 43 | 49 | 46 | 33 | 24 | 33 |
